# Supplementary material for: SMAD Signaling Is Required for Structural Integrity of the Female Reproductive Tract and Uterine Function During Early Pregnancy in Mice
Source: PubMed Central journal article supplement — Biol Reprod. 2016 Jun 22;95(2):44. doi: 10.1095/biolreprod.116.139477 (PMC5029477; doi:10.1095/biolreprod.116.139477), 2016-06-22
Supplement: supp_116.139477_biolreprod.116.139477-1.pdf [file supp_116.139477_biolreprod.116.139477-1.pdf]

Rodriguez et al., Supplemental Data

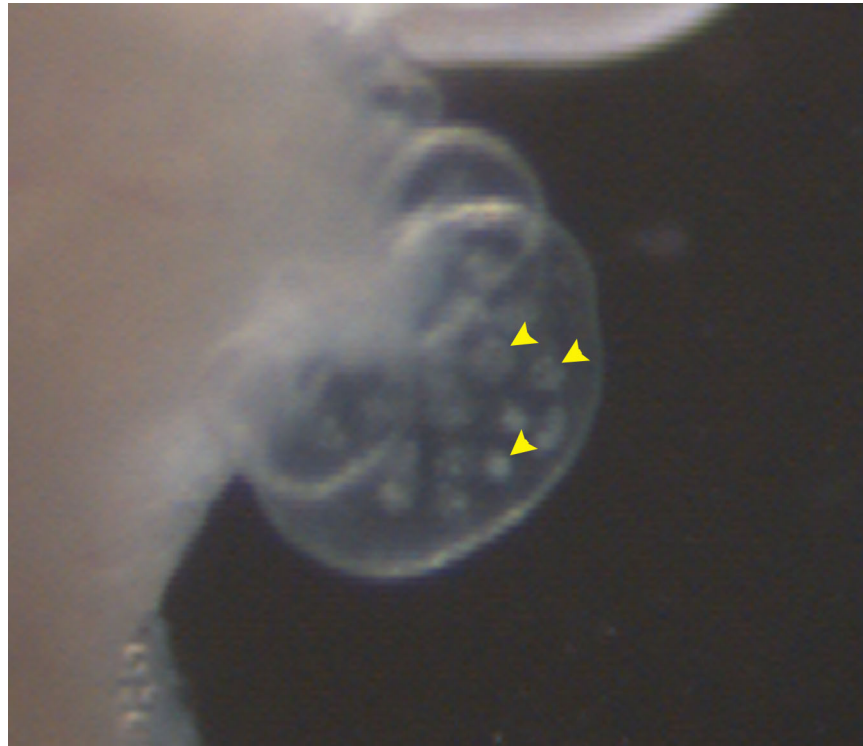

**S1 Fig. Larger panel shown in Fig. 2B of the oviduct diverticuli of *Smad1/5/4-Amhr2cre* KO from the manuscript.** The diverticuli contain cell debris and large round structures (arrowheads) that are likely degenerating oocytes/embryos. Such diverticuli have been previously shown to collect oocytes/embryos (Ref. 33).

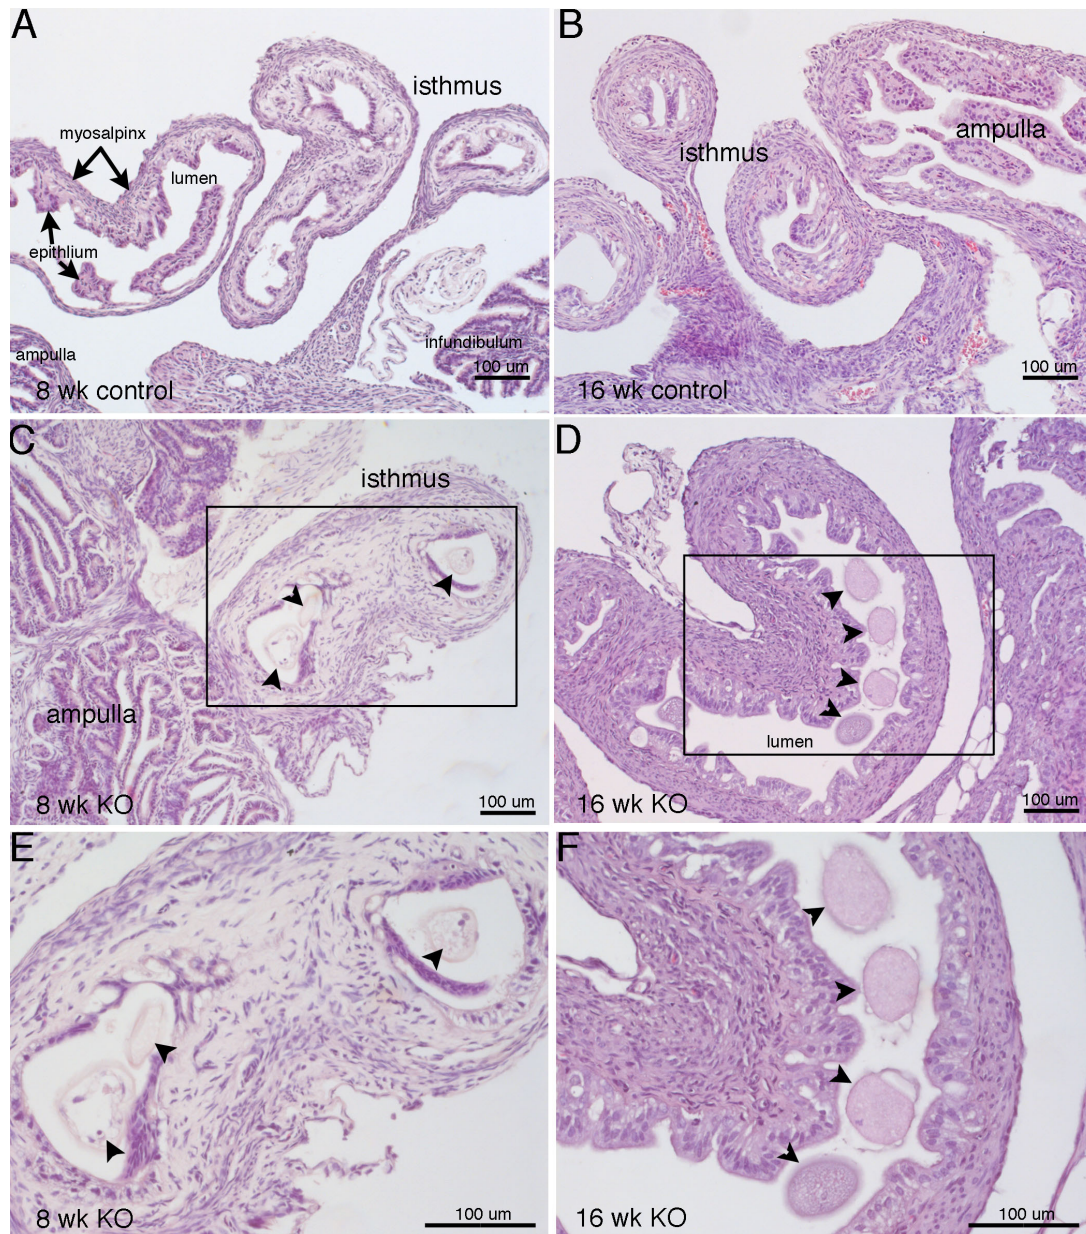

**S2 Fig. Additional histology of control and *Smad1/5/4-Amhr2cre* oviducts.** Tissue sections were stained with H&E in 8 and 16 wk old control (A, B) and *Smad1/5/4-Amhr2cre* KO (C-F) mice. (A) There is an obvious thickening of the walls of *Smad1/5/4-Amhr2cre* oviducts at 8 wk (C) and 16 wk (D). In addition, oocytes were frequently observed within different regions of the oviduct in *Smad1/5/4* (arrowheads in C-F), but only rarely in the control oviducts. The boxed regions in panels C, D are shown as higher magnifications in panels E, F, respectively. Scale bar is 100  $\mu$ m.

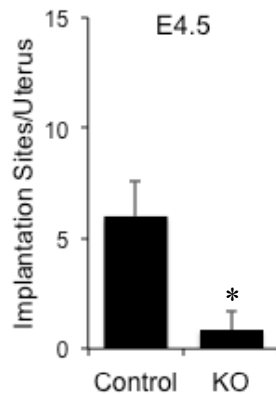

**S3 Fig. Quantification of implantation sites at E4.5.** 6-week old control (n=5) and *Smad1/5/4 Amh2cre* KO (n=6) females were mated with wild type males. Female mice were given retro-orbital injections of Chicago blue dye to visualize implantation sites four days after the presence of a seminal plug was noted. Uteri were dissected and implantation sites counted. *Smad1/5/4 Amh2cre* KO uteri contained significantly fewer implantation sites compared to control uteri (\* $P < 0.05$ )

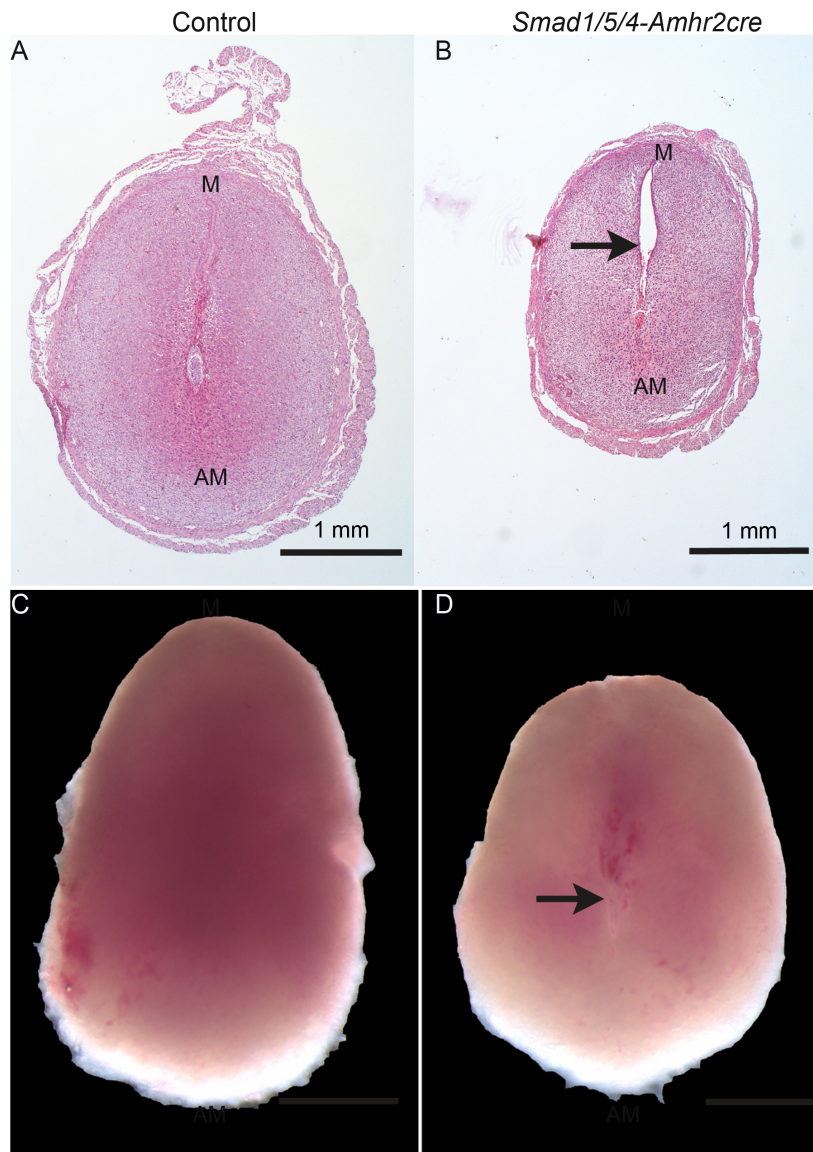

**S4 Fig. *Smad1/5/4-Amhr2cre* KO mice show uterine defects in luminal closure and decidualization.** (A) H&E staining of a control implantation site at E5.5 displaying lumen closure and normal decidualization, while (B) the *Smad1/5/4-Amhr2cre* KO implantation site contains an unclosed uterine lumen (arrow). (C, D) Gross morphology of decidua isolated from E6.5 control and *Smad1/5/4-Amhr2cre* KO implantation sites. *Smad1/5/4-Amhr2cre* KO females fail to develop a fully formed decidua surrounding the embryo (arrow). AM, anti-mesometrium, M, mesometrium.

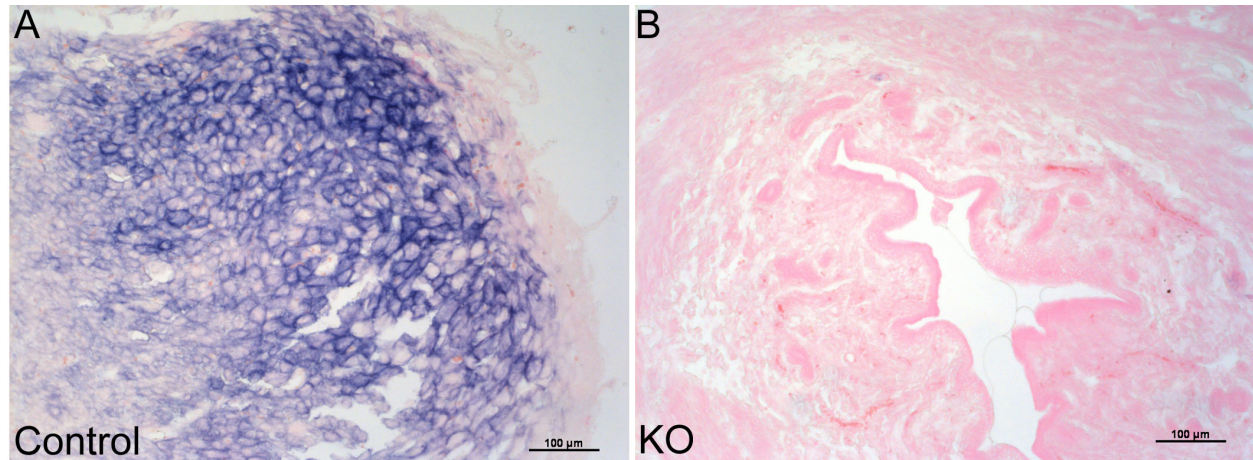

**S5 Fig. *Smad1/5/4-Amhr2cre* KO mice do not undergo stromal cell differentiation during artificial decidualization.** Stromal cell differentiation assayed by alkaline phosphatase staining in control (n=3) and *Smad1/5/4-Amhr2cre* KO (n=3) uteri that had undergone artificial decidualization. (A) The control uterus has robust blue staining indicating differentiation. (B) The *Smad1/5/4-Amhr2cre* KO uterus showed no alkaline phosphatase activity. Tissue is counterstained with nuclear fast red. Scale bar, 100 μm

**Supplemental Table S1. List of primer sequences used for quantitative PCR.**

| Target Gene   |         | Primer Sequence             |
|---------------|---------|-----------------------------|
| <i>Bmp2</i>   | Forward | 5'- GGGACCCGCTGTCTTCTAGT    |
|               | Reverse | 5'- TCAACTCAAATTCGCTGAGGAC  |
| <i>Ccne2</i>  | Forward | 5'- GCTGATTCCCTCCAGACAGTACA |
|               | Reverse | 5'- ATGTCAAGACGCAGCCGTTTA   |
| <i>Esr1</i>   | Forward | 5'- GCTCCTAACTTGCTCCTGGAC   |
|               | Reverse | 5'- CAGCAACATGTCAAAGATCTCC  |
| <i>Fkbp5</i>  | Forward | 5'- TGAGGGCACCAGTAACAATGG   |
|               | Reverse | 5'- CAACATCCCTTTGTAGTGGACAT |
| <i>Gjal</i>   | Forward | 5' ACAGCGGTTGAGTCAGCTTG     |
|               | Reverse | 5'- GAGAGATGGGGAAGGACTTGT   |
| <i>Lefty</i>  | Forward | 5'- AGCTCAAGGCAATTGTG       |
|               | Reverse | 5'- CTTACGCTGACAATC         |
| <i>Mcm5</i>   | Forward | 5'- CAGAGGCGATTCAAGGAGTTC   |
|               | Reverse | 5'- CGATCCAGTATTCACCCAGGT   |
| <i>Prl8a2</i> | Forward | 5'- CCTCATCACGTCTATACAT     |
|               | Reverse | 5'- GCTGCATCAATTCCTG        |
| <i>Pgr</i>    | Forward | 5'- CTCCGGGACCGAACAGAGT     |
|               | Reverse | 5'- ACAACAACCCTTTGGTAGCAG   |
| <i>Ptgs2</i>  | Forward | 5'- CCAGCACTTCACCCATCAGTT   |
|               | Reverse | 5'- ACCCAGGTCCTCGCTTATGA    |
| <i>Wnt4</i>   | Forward | 5'- AGACGTGCGAGAAACTCAAAG   |
|               | Reverse | 5'- GGAAGTGGTATTGGCACTCCT   |
